# Supplementary material for: A Highly Effective Bacteriophage-1252 to Control Multiple Serovars of Salmonella enterica
Source: MDPI journal article supplement (doi:10.3390/foods12040797), 2023-02-13
Supplement: s1 [file s1]

Table S1 Sources of samples and bacterial host cell analysis.

| Sources                            | Sample No. | <i>Salmonella</i> spp. (bacterial host cell) |
|------------------------------------|------------|----------------------------------------------|
| Pond water<br>(Farm #1)            | 1208       | -                                            |
|                                    | 1209       | -                                            |
|                                    | 1210       | -                                            |
|                                    | 1211       | -                                            |
|                                    | 1212       | +                                            |
|                                    | 1213       | +                                            |
|                                    | 1214       | -                                            |
|                                    | 1215       | -                                            |
|                                    | 1216       | +                                            |
|                                    | 1217       | +                                            |
|                                    | 1218       | -                                            |
|                                    | 1219       | -                                            |
| Cattle feces<br>(Farm #1)          | 1220       | +                                            |
|                                    | 1221       | +                                            |
|                                    | 1222       | -                                            |
|                                    | 1223       | +                                            |
|                                    | 1224       | -                                            |
|                                    | 1225       | +                                            |
|                                    | 1226       | -                                            |
|                                    | 1227       | -                                            |
|                                    | 1228       | -                                            |
|                                    | 1229       | -                                            |
| Cattle drinking water<br>(Farm #2) | 1240       | +                                            |
|                                    | 1241       | -                                            |
|                                    | 1242       | +                                            |
|                                    | 1243       | -                                            |
|                                    | 1244       | -                                            |
|                                    | 1245       | -                                            |
|                                    | 1246       | -                                            |
|                                    | 1247       | +                                            |
|                                    | 1248       | -                                            |
|                                    | 1249       | +                                            |
| Cattle lagoon water<br>(Farm #2)   | 1250       | -                                            |
|                                    | 1251       | -                                            |
|                                    | 1252       | +                                            |
|                                    | 1253       | +                                            |
|                                    | 1254       | +                                            |
|                                    | 1255       | +                                            |
|                                    | 1256       | +                                            |
|                                    | 1257       | +                                            |
|                                    | 1258       | +                                            |
|                                    | 1259       | +                                            |
| Cattle feces<br>(Farm #2)          | 1335       | +                                            |
|                                    | 1336       | +                                            |

|                            |      |   |
|----------------------------|------|---|
|                            | 1337 | + |
|                            | 1338 | + |
|                            | 1339 | + |
| Chicken feces<br>(Farm #3) | CF   | + |
| Chicken water<br>(Farm #3) | CW   | + |
| Turkey feces<br>(Farm #4)  | 2902 | + |

"+", *Salmonella*-specific phage was identified and isolated from farm the samples; "-", no phages were identified from the farm sample.
